# Supplementary material for: A Pilot Study on Industry Stakeholders’ Views towards Revalorization of Surplus Material from the Fruit and Vegetable Sector as a Way to Reduce Food Waste
Source: MDPI journal article supplement (doi:10.3390/su152316147), 2023-11-21
Supplement: s1 [file s1]

Archive with 1 entries (1 files):
- sustainability-2705912-supplementary.pdf
